# Supplementary material
Source: PubMed Central journal article supplement (PMC3004350)
Supplement: supp_84_24_12555__1.pdf [file supp_84_24_12555__1.pdf]

**Figure S1.** G+C content of the six Prasinovirus genomes.

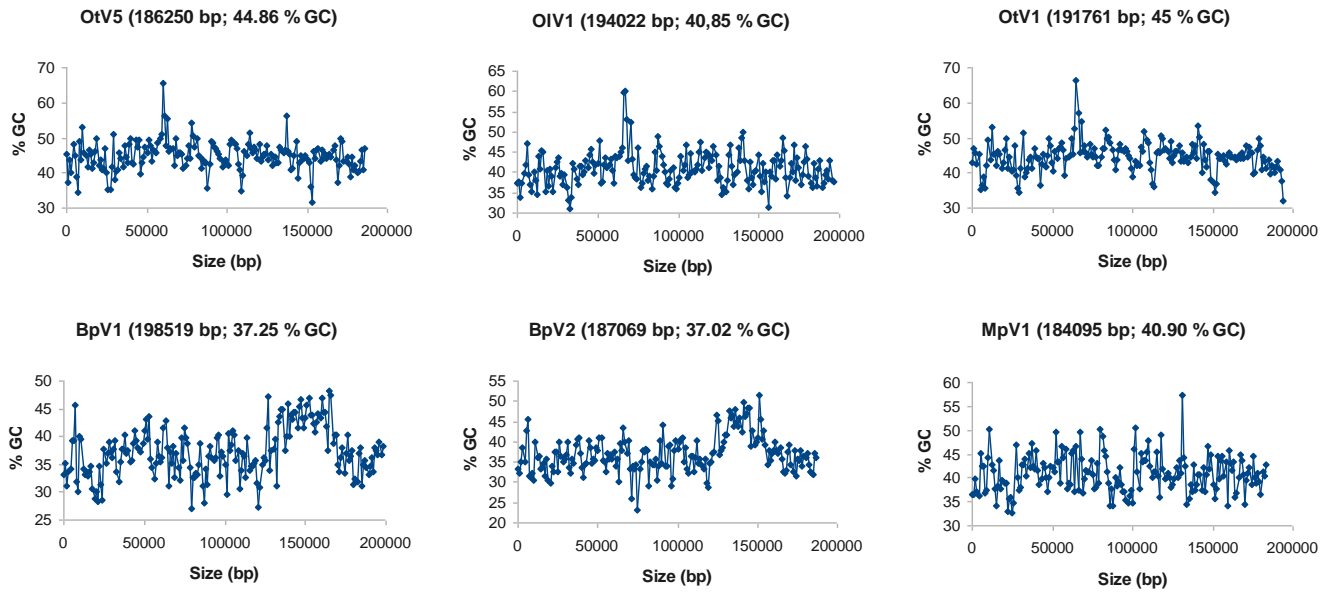

The G + C profile represents a slipping window of 1000 bp

**Figure S2.** Alignment of the first 240 amino acids of predicted clp4 proteins with their putative orthologs in *Chlorella* viruses

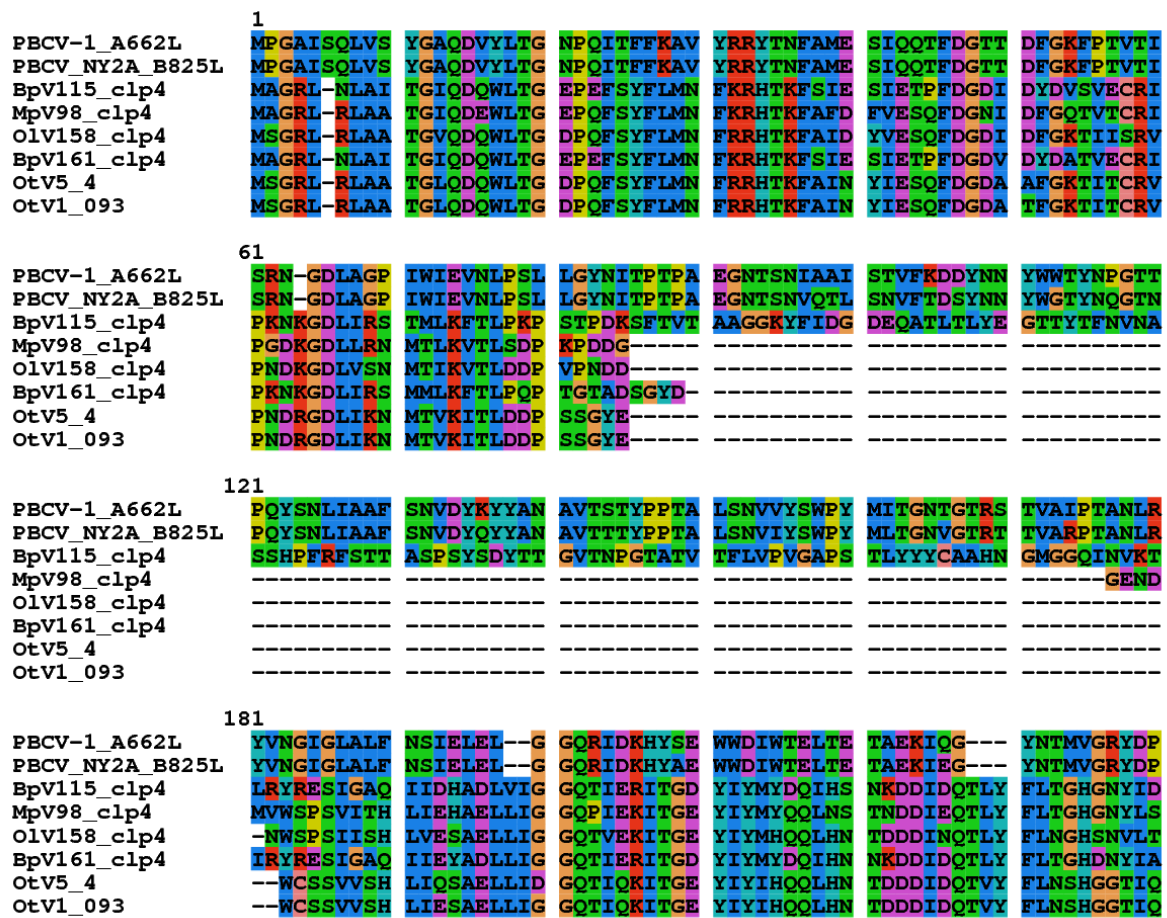

**Figure S3.** Categories of common and specific Prasinovirus genes

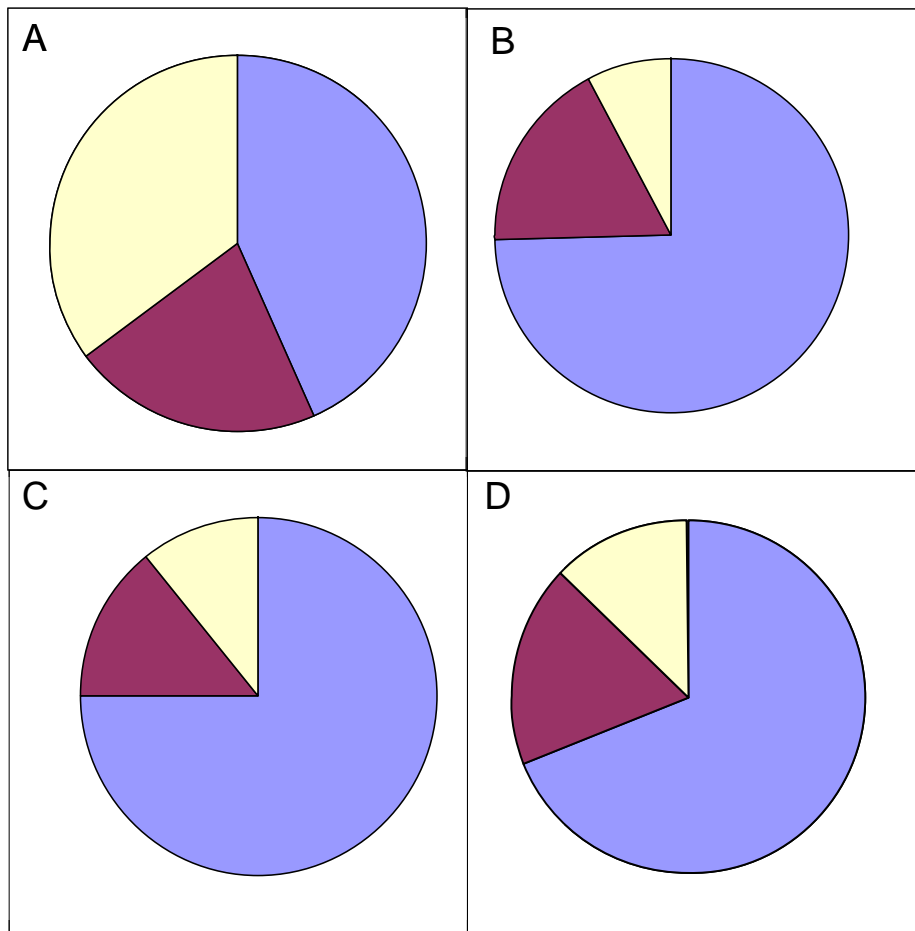

Distribution (%) of common and specific Prasinovirus genes. “Putative Identified Genes, PIG” ■, “Putative Unknown Genes, PUG” ■ and “Putative Orphan Genes, POG” ■ for the 125 CDSs common to the six Prasinoviruses (A), the *Bathycoccus* (B), the *Micromonas* (C) and the *Ostreococcus* (D) virus specific CDSs.

**Figure S4.** Pairwise amino acid identities of the six Prasinovirus proteomes

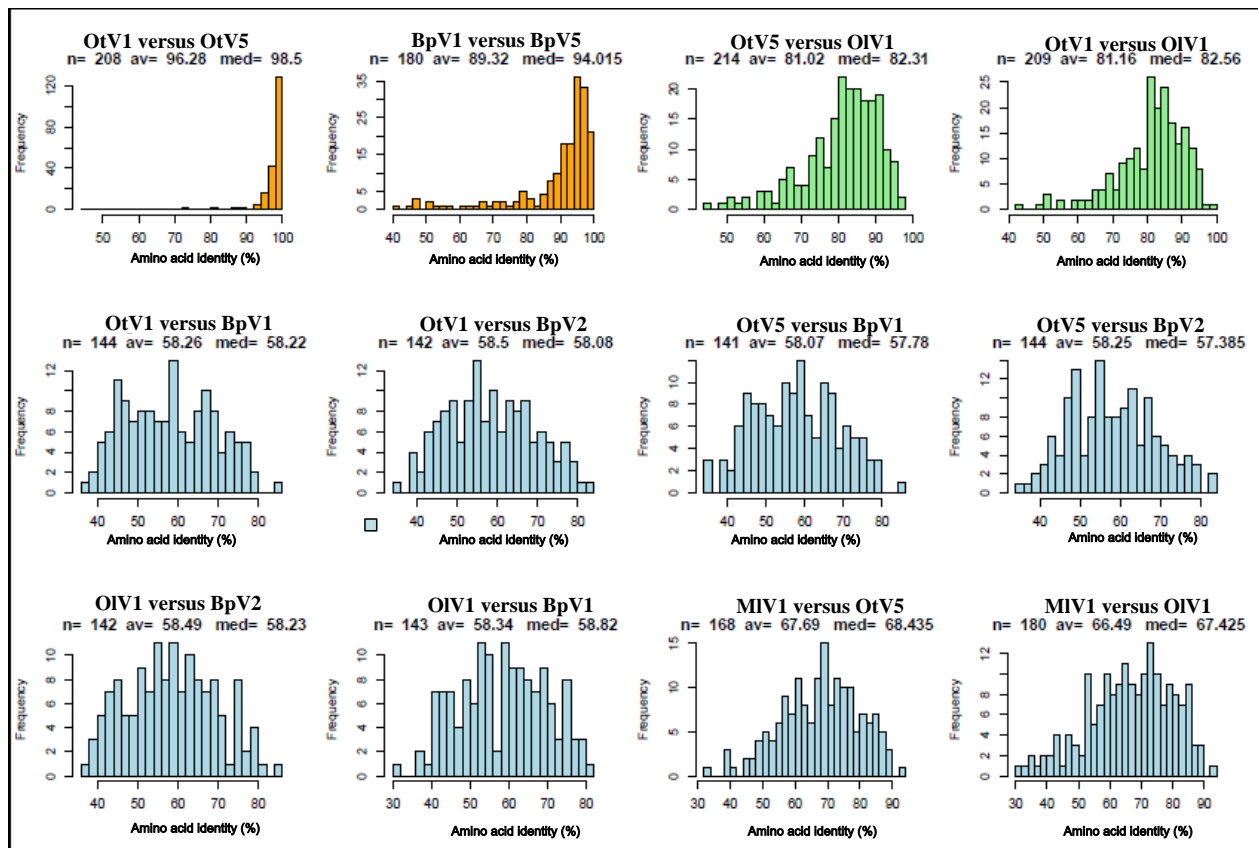

**Figure S5.** Phylogenies of Acetolactate synthase, 3-Dehydroquinate synthase and Asparagine synthase Prasinovirus genes with their best blast hits.

**A. Acetolactate synthase**

**B. 3-Dehydroquinate synthase**

**C. Asparagine synthase**

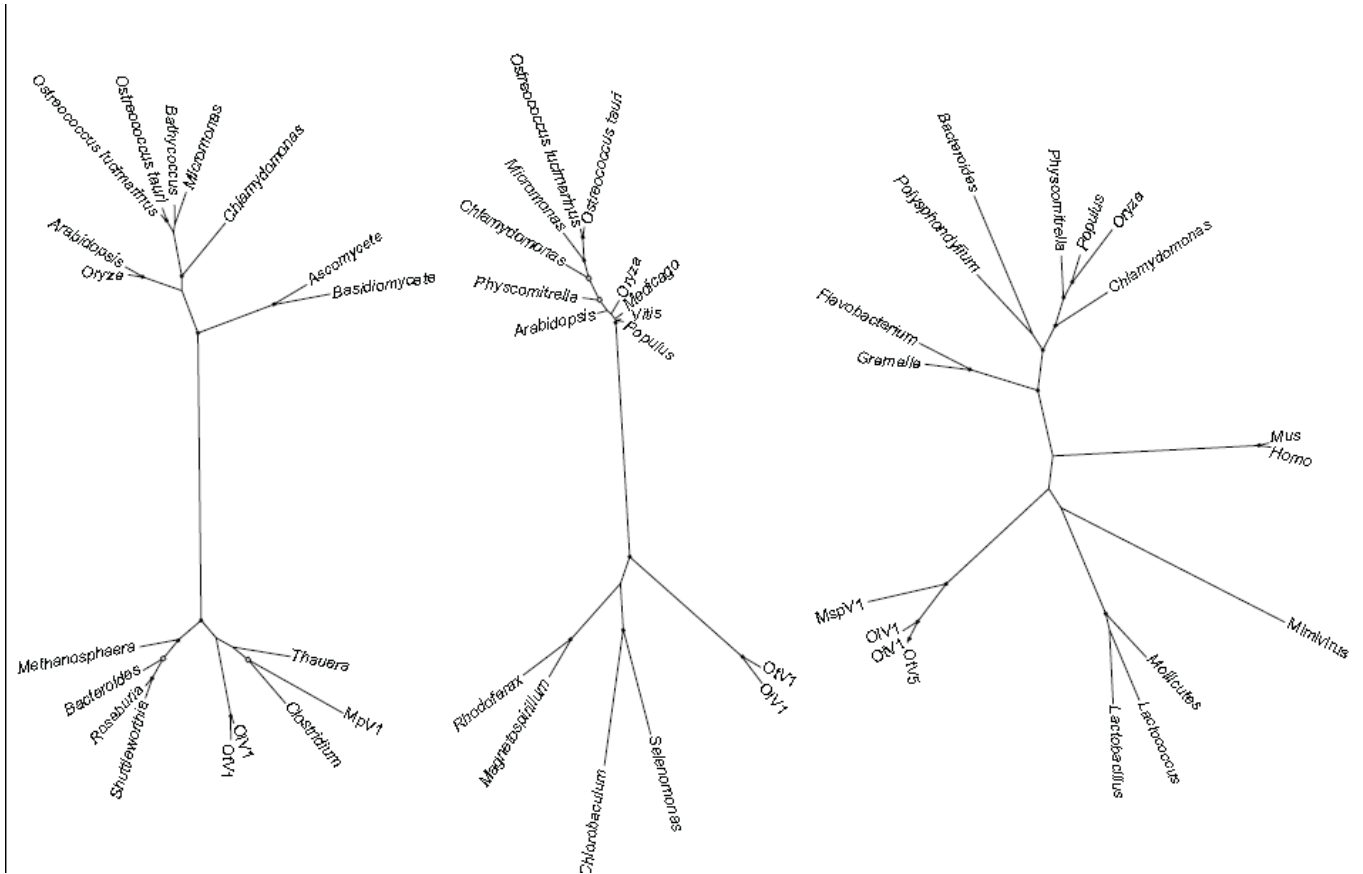

**Figure S6.** Phylogenies of genus-specific PIGs (putative identified genes)

A. Phylogenetic analysis of the BpV1 and BpV2 HSP70 sequences

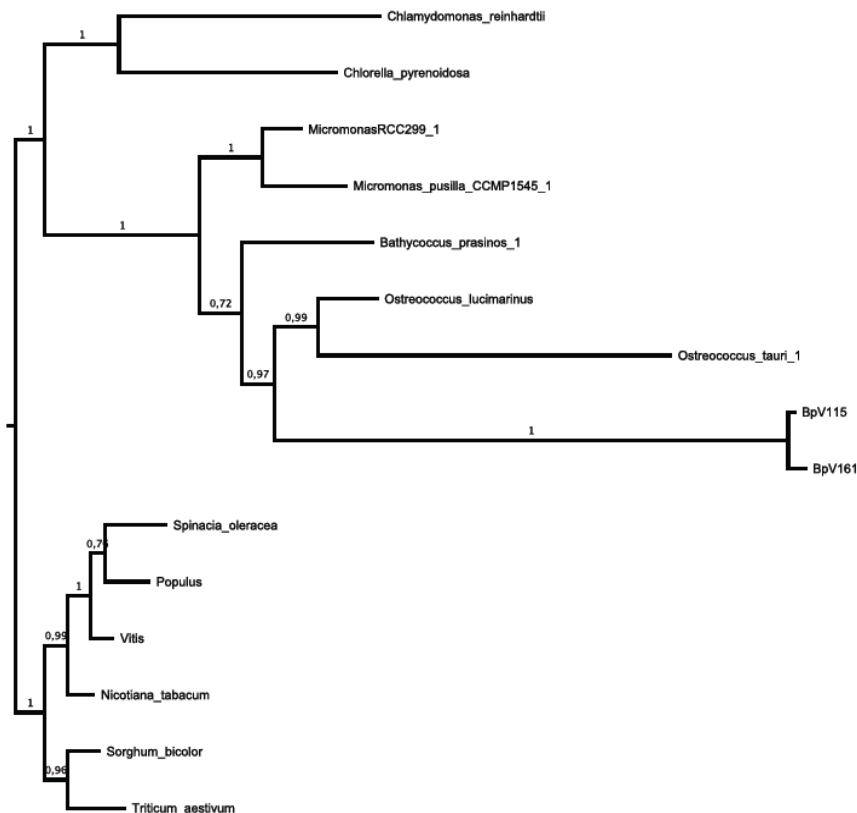

B. The three known pathways for synthesis of dUMP, an intermediate in dTT synthesis

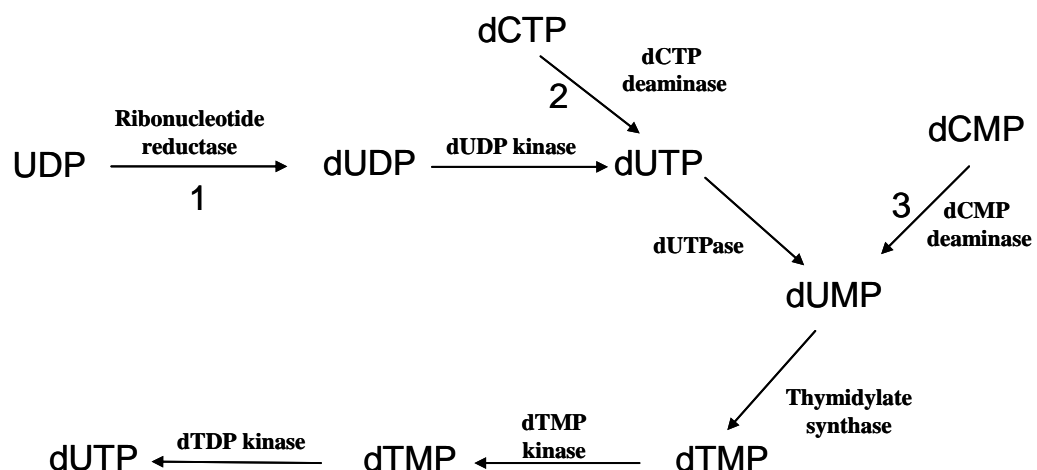

(A) - The *hsp70* gene in *Bathycoccus* viruses was probably acquired from its host (Fig. S6A). Heat-shock proteins (HSPs) participate in diverse functions including: (a) protein folding, (b) vesicular transport, (c) protein aggregation and (e) cellular signaling. HSP70 chaperones

regulate RNA replication for Tombus- (1) or Closteroviruses (2). Many other phylogenetically diverse viruses have recruited an hsp70 gene, (ranging from bacteriophages such as P1 and  $\lambda$ , through RNA viruses such as HIV, to large DNA viruses such as herpesviruses and mimiviruses (see 3 for a review).

(B) – dCMP [deaminase, found](#) in all of the known Chlorellavirus genomes, is encoded by MpV1 and OIV1 but is absent in the other Prasinoviruses (Fig. S6B). In contrast the other route represented by ribonucleotide reductase (coded by 432 dsDNA viruses) is present in all Prasinoviruses. Chlorella virus CMP deaminase has a double activity, i.e. the classical dCMP deaminase activity producing dUMP, but also dCTP deaminase activity producing dUTP. The most conserved domain of dCMP deaminases, which forms the catalytic site, is conserved, as well as the amino acid residues of the zinc ion-binding site (4).

## References

1. Yung-Liang W-R., Stork J, Nagy P-D (2009) A key role for heat shock protein 70 in the localization and insertion of Tombusvirus replication proteins to intracellular membranes. *J Virology* 83: 3276-3287.
2. Dolja V-V, Kreuze JF, Valkonen J-P (2006) Comparative and functional genomics of closteroviruses. *Virus Res* 117:38-51.
3. Mayer M-P (2005) Recruitment of Hsp70 chaperones: a crucial part of viral survival strategies. *Rev Physiol Biochem Pharmacol* 153:1-46.
4. Graziani S, Bernauer J, Skouloubris S, Graille M, Zhou C-Z, Marchand C, Decottignies P, van Tilbeurgh H, Myllykallio H, Liebl U (2006) Catalytic mechanism and structure of viral flavin-dependent thymidylate synthase ThyX. *J Biol Chem.* [281:24048-24057.](#)

**Table S1.** Genomic densities of Prasinovirus core ORFs

| <b>Position (Kb)</b> | <b>BpV1</b> | <b>BpV2</b> | <b>MpV1</b> | <b>OIV1</b> | <b>OtV1</b> | <b>OtV5</b> |
|----------------------|-------------|-------------|-------------|-------------|-------------|-------------|
| 10                   | 2           | 2           | 2           | 2           | 2           | 4           |
| 20                   | 11          | 10          | 9           | 4           | 8           | 8           |
| 30                   | 5           | 6           | 1           | 8           | 4           | 2           |
| 40                   | 7           | 7           | 6           | 2           | 4           | 6           |
| 50                   | 5           | 5           | 6           | 9           | 7           | 5           |
| 60                   | 6           | 9           | 5           | 5           | 5           | 5           |
| 70                   | 5           | 11          | 5           | 1           | 5           | 7           |
| 80                   | 13          | 9           | 11          | 8           | 8           | 11          |
| 90                   | 7           | 5           | 11          | 13          | 15          | 12          |
| 100                  | 11          | 10          | 5           | 13          | 3           | 1           |
| 110                  | 9           | 10          | 14          | 9           | 11          | 11          |
| 120                  | 10          | 11          | 10          | 11          | 7           | 9           |
| 130                  | 9           | 7           | 10          | 6           | 9           | 8           |
| 140                  | 2           | 0           | 7           | 8           | 9           | 9           |
| 150                  | 0           | 0           | 9           | 6           | 4           | 7           |
| 160                  | 0           | 10          | 3           | 7           | 8           | 7           |
| 170                  | 3           | 8           | 6           | 3           | 7           | 7           |
| 180                  | 11          | 5           | 5           | 7           | 4           | 4           |
| 190                  | 8           |             |             | 3           | 5           | 2           |
| 200                  | 1           |             |             |             |             |             |

Values in this table represent the number of ORFs determined every 10 Kb for each viral genome.



**Table S2.** Identified genes in Prasino- and Chlorella-viruses

| Gene names                                             | Bpv1 | BpV2 | MpV1 | OIV1 | OtV1 | OtV5 | PBCV-1 | NY-2A | AR 158 | MT 325 | FR 483 | ATCV-1 |
|--------------------------------------------------------|------|------|------|------|------|------|--------|-------|--------|--------|--------|--------|
| <b>DNA, replication, recombination and repair</b>      |      |      |      |      |      |      |        |       |        |        |        |        |
| DNA polymerase                                         | 1    | 1    | 1    | 1    | 1    | 1    | 1      | 1     | 1      | 1      | 1      | 1      |
| Archaeo-eukaryotic primase                             | 0    | 0    | 0    | 0    | 0    | 0    | 1      | 1     | 1      | 1      | 1      | 1      |
| PCNA                                                   | 1    | 1    | 1    | 1    | 1    | 1    | 2      | 2     | 2      | 2      | 2      | 2      |
| Replication factor C                                   | 0    | 0    | 0    | 0    | 0    | 0    | 1      | 1     | 1      | 1      | 1      | 1      |
| Rnase H                                                | 1    | 1    | 1    | 1    | 1    | 1    | 1      | 1     | 1      | 1      | 1      | 1      |
| Helicase                                               | 1    | 1    | 1    | 1    | 1    | 1    | 1      | 1     | 1      | 1      | 1      | 1      |
| DNA topoisomerase                                      | 1    | 1    | 1    | 1    | 2    | 2    | 1      | 1     | 1      | 1      | 1      | 1      |
| ATPase (PP-loop)                                       | 0    | 0    | 0    | 0    | 0    | 0    | 1      | 1     | 1      | 1      | 1      | 1      |
| ATPase (DNA packaging)                                 | 1    | 1    | 1    | 1    | 1    | 1    | 1      | 1     | 1      | 1      | 1      | 1      |
| Pyrimidine dinner-specific glycosylase                 | 0    | 0    | 0    | 0    | 0    | 0    | 1      | 1     | 1      | 1      | 1      | 1      |
| ATP dependant DNA ligase                               | 1    | 1    | 1    | 1    | 1    | 1    | 1      | 1     | 1      | 0      | 0      | 1      |
| Exonuclease                                            | 2    | 2    | 2    | 2    | 2    | 2    | 1      | 1     | 1      | 1      | 1      | 1      |
| NTPase/helicase                                        | 1    | 1    | 1    | 1    | 1    | 1    | 0      | 0     | 0      | 0      | 0      | 0      |
| <b>Transcription</b>                                   |      |      |      |      |      |      |        |       |        |        |        |        |
| Transcription factor IIB                               | 1    | 1    | 1    | 1    | 1    | 1    | 1      | 1     | 1      | 1      | 1      | 1      |
| Transcription factor IID                               | 0    | 0    | 0    | 0    | 0    | 0    | 1      | 1     | 1      | 1      | 1      | 1      |
| Transcription factor IIS                               | 1    | 1    | 1    | 1    | 1    | 1    | 1      | 1     | 1      | 1      | 1      | 1      |
| Transcription activator /SWI/SNF helicase              | 1    | 1    | 1    | 1    | 1    | 1    | 1      | 1     | 1      | 1      | 1      | 1      |
| Tata-box Binding Protein (TBP)                         | 1    | 1    | 1    | 1    | 1    | 1    | 0      | 0     | 0      | 0      | 0      | 0      |
| Superfamily II helicase                                | 0    | 0    | 0    | 0    | 0    | 0    | 3      | 3     | 3      | 3      | 3      | 1      |
| mRNA guanylyltransferase/mRNA capping enzyme           | 2    | 2    | 2    | 2    | 2    | 2    | 1      | 1     | 1      | 1      | 1      | 1      |
| RNA triphosphatase                                     | 0    | 0    | 0    | 0    | 0    | 0    | 1      | 1     | 1      | 1      | 1      | 1      |
| Histone H3, Lys27 methylase                            | 0    | 0    | 0    | 0    | 0    | 0    | 1      | 2     | 2      | 1      | 1      | 1      |
| RNase III                                              | 1    | 1    | 1    | 1    | 1    | 1    | 1      | 1     | 1      | 1      | 1      | 1      |
| Cytosine deaminase                                     | 0    | 0    | 0    | 0    | 0    | 0    | 1      | 1     | 1      | 1      | 1      | 1      |
| <b>Sugar manipulation enzymes</b>                      |      |      |      |      |      |      |        |       |        |        |        |        |
| GDP-D-mannose dehydratase epimerase                    | 1    | 1    | 1    | 1    | 1    | 1    | 1      | 1     | 1      | 0      | 0      | 1      |
| 6-Phospho fructokinase                                 | 0    | 0    | 1    | 1    | 1    | 1    | 0      | 0     | 0      | 0      | 0      | 0      |
| $\alpha$ 1, 2-galactosyl-transferase                   | 0    | 0    | 1    | 0    | 1    | 1    | 0      | 0     | 0      | 0      | 0      | 0      |
| glycosyltransferase                                    | 3    | 3    | 3    | 6    | 6    | 6    | 0      | 0     | 0      | 0      | 0      | 0      |
| UDP-glucose 6-dehydrogenase                            | 0    | 0    | 0    | 0    | 0    | 0    | 1      | 1     | 2      | 1      | 1      | 1      |
| Mannose-6P- isomerase                                  | 0    | 0    | 0    | 0    | 0    | 0    | 0      | 0     | 0      | 0      | 0      | 1      |
| Glucosamine synthase                                   | 0    | 0    | 0    | 0    | 0    | 0    | 1      | 1     | 1      | 1      | 1      | 0      |
| Hyaluronan synthase                                    | 0    | 0    | 0    | 0    | 0    | 0    | 1      | 0     | 0      | 1      | 1      | 0      |
| dTDP-D-glucose 4,6-dehydratase                         | 0    | 0    | 1    | 2    | 2    | 2    | 0      | 0     | 0      | 0      | 0      | 1      |
| Chitin synthase                                        | 0    | 0    | 0    | 0    | 0    | 0    | 0      | 2     | 3      | 0      | 0      | 0      |
| Cellulase precursor                                    | 0    | 0    | 0    | 0    | 0    | 0    | 0      | 0     | 1      | 1      | 1      | 1      |
| dTDP-glucose pyrophosphorylase                         | 0    | 0    | 0    | 0    | 0    | 0    | 0      | 0     | 0      | 1      | 1      | 0      |
| Polysaccharide deacetylase                             | 0    | 0    | 0    | 0    | 0    | 0    | 0      | 1     | 1      | 0      | 0      | 0      |
| <b>DNA methylation and site-specific endonucleases</b> |      |      |      |      |      |      |        |       |        |        |        |        |
| Adenine DNA methyltransferase                          | 1    | 1    | 1    | 2    | 3    | 3    | 2      | 11    | 9      | 0      | 1      | 0      |
| Cytosine DNA methyltransferase                         | 0    | 0    | 0    | 0    | 0    | 0    | 3      | 7     | 7      | 1      | 2      | 1      |
| Methyltransferase FkbM                                 | 0    | 0    | 0    | 1    | 1    | 1    | 0      | 1     | 1      | 1      | 1      | 0      |
| cytosine-C5 specific DNA methylase                     | 0    | 0    | 1    | 0    | 1    | 0    | 0      | 0     | 0      | 0      | 0      | 0      |

|                              |   |   |   |   |   |   |   |   |   |   |   |   |
|------------------------------|---|---|---|---|---|---|---|---|---|---|---|---|
| DNA methylase,N6_N4_Mtase    | 0 | 0 | 0 | 1 | 0 | 0 | 0 | 0 | 0 | 0 | 0 | 0 |
| DNA restriction endonuclease | 0 | 0 | 0 | 0 | 0 | 0 | 2 | 2 | 2 | 0 | 0 | 0 |

### Cell wall degradation

|                                   |   |   |   |   |   |   |   |   |   |   |   |   |
|-----------------------------------|---|---|---|---|---|---|---|---|---|---|---|---|
| Chitinase                         | 0 | 0 | 0 | 0 | 0 | 0 | 2 | 1 | 1 | 2 | 1 | 2 |
| Chitosanase                       | 0 | 0 | 0 | 0 | 0 | 0 | 1 | 1 | 1 | 1 | 1 | 1 |
| Beta, alpha 1,4- glucuronic lyase | 0 | 0 | 0 | 0 | 0 | 0 | 1 | 2 | 2 | 1 | 1 | 1 |
| Beta-1,3-glucanase                | 0 | 0 | 0 | 0 | 0 | 0 | 1 | 1 | 1 | 1 | 1 | 1 |
| $\alpha$ -L-arabino furanosidase  | 0 | 0 | 0 | 0 | 0 | 0 | 0 | 0 | 0 | 0 | 0 | 1 |

### Nucleotide metabolism

|                                       |   |   |   |   |   |   |   |   |   |   |   |   |
|---------------------------------------|---|---|---|---|---|---|---|---|---|---|---|---|
| Ribonucleotide reductase Lsubunit     | 1 | 1 | 1 | 1 | 1 | 1 | 1 | 1 | 1 | 1 | 1 | 1 |
| Ribonucleotide reductase Ssubunit     | 1 | 1 | 1 | 1 | 1 | 1 | 1 | 1 | 1 | 1 | 1 | 1 |
| Thymidylate S                         | 1 | 1 | 1 | 1 | 1 | 1 | 1 | 1 | 1 | 1 | 1 | 1 |
| Thymidine Kinase                      | 1 | 1 | 1 | 1 | 1 | 1 | 0 | 0 | 0 | 0 | 0 | 0 |
| dUTP pyrophosphatase                  | 1 | 1 | 1 | 1 | 1 | 1 | 1 | 1 | 1 | 1 | 1 | 1 |
| Aspartate transcarbamylase            | 0 | 0 | 0 | 0 | 0 | 0 | 1 | 1 | 1 | 0 | 0 | 0 |
| Deoxynucleoside kinase                | 0 | 0 | 0 | 0 | 0 | 0 | 1 | 0 | 0 | 1 | 1 | 1 |
| Glutaredoxin                          | 0 | 0 | 0 | 0 | 0 | 0 | 1 | 1 | 1 | 2 | 2 | 2 |
| Thioredoxin                           | 0 | 0 | 0 | 0 | 0 | 0 | 1 | 1 | 1 | 3 | 3 | 2 |
| Ribonucleotide-triphosphate reductase | 0 | 0 | 0 | 0 | 0 | 0 | 0 | 0 | 0 | 0 | 0 | 1 |
| dCMP deaminase                        | 0 | 0 | 0 | 0 | 0 | 0 | 1 | 1 | 1 | 1 | 1 | 1 |
| CMP/dCMP deaminase zinc-binding       | 0 | 0 | 1 | 1 | 0 | 0 | 0 | 0 | 0 | 0 | 0 | 0 |

### Protein synthesis and degradation

|                                              |   |   |   |   |   |   |   |   |   |   |   |   |
|----------------------------------------------|---|---|---|---|---|---|---|---|---|---|---|---|
| Acetolactate synthase (2-2-1-6) (TPP)        | 0 | 0 | 1 | 1 | 1 | 1 | 0 | 0 | 0 | 0 | 0 | 0 |
| 4-hydroxy-2-oxovalerate aldolase             | 0 | 0 | 1 | 0 | 0 | 0 | 0 | 0 |   | 0 | 0 | 0 |
| acetaldehyde dehydrogenase, MhpF             | 0 | 0 | 1 | 0 | 0 | 0 | 0 | 0 | 0 | 0 | 0 | 0 |
| 3-Dehydroquinate synthase                    | 0 | 0 | 0 | 1 | 1 | 1 | 0 | 0 | 0 | 0 | 0 | 0 |
| Oxoacyl (acyl-carrier protein) dehydrogenase | 0 | 0 | 0 | 1 | 1 | 1 | 0 | 0 | 0 | 0 | 0 | 0 |
| Aminotransferase family protein              | 2 | 0 | 1 | 1 | 1 | 1 | 0 | 0 | 0 | 0 | 0 | 0 |
| Asparagine synthase                          | 0 | 0 | 1 | 1 | 1 | 1 | 0 | 0 | 0 | 0 | 0 | 0 |
| NAD-dependant epimerase dehydratase          | 0 | 0 | 1 | 1 | 1 | 1 | 0 | 0 | 0 | 0 | 0 | 0 |
| N-myristoyl transferase                      | 1 | 1 | 0 | 1 | 1 | 1 | 0 | 0 | 0 | 0 | 0 | 0 |
| HSP70                                        | 1 | 1 | 0 | 0 | 0 | 0 | 0 | 0 | 0 | 0 | 0 | 0 |
| Prolyl 4-hydroxylase                         | 1 | 1 | 1 | 1 | 1 | 1 | 1 | 1 | 1 | 1 | 1 | 1 |
| 33 kDa in vitro translation peptide          | 2 | 2 | 3 | 2 | 2 | 2 | 0 | 0 | 0 | 0 | 0 | 0 |
| Translation elongation factor-3              | 0 | 0 | 0 | 0 | 0 | 0 | 2 | 0 | 1 | 2 | 1 | 1 |
| Thiol oxydoreductase                         | 0 | 0 | 0 | 0 | 0 | 0 | 1 | 1 | 1 | 1 | 1 | 1 |
| Protein disulfide isomerase                  | 0 | 0 | 0 | 0 | 0 | 0 | 1 | 1 | 1 | 1 | 1 | 1 |
| SKP-1 protein                                | 0 | 0 | 0 | 0 | 0 | 0 | 1 | 1 | 1 | 1 | 1 | 1 |
| Ubiquitin                                    | 0 | 0 | 0 | 0 | 0 | 0 | 0 | 1 | 0 | 0 | 0 | 1 |
| Ring finger ubiquitin ligase                 | 0 | 0 | 0 | 0 | 0 | 0 | 1 | 1 | 1 | 1 | 1 | 1 |
| proline dehydrogenase                        | 0 | 0 | 0 | 1 | 1 | 1 | 0 | 0 | 0 | 0 | 0 | 0 |
| TRP domain protein                           | 0 | 0 | 0 | 1 | 1 | 1 | 0 | 0 | 0 | 0 | 0 | 0 |
| 2OG-Fe(II) oxygenase                         | 1 | 1 | 1 | 1 | 1 | 1 | 0 | 0 | 0 | 0 | 0 | 0 |
| Aspartyl/Asparaginyl beta-hydrolase          | 1 | 1 | 1 | 2 | 2 | 1 | 0 | 0 | 0 | 0 | 0 | 0 |
| Ubiquitin hydrolase-like cystein peptidase   | 1 | 1 | 1 | 1 | 1 | 1 | 1 | 1 | 1 | 1 | 1 | 1 |
| FtsH (3-4-24) metalloendopeptidase           | 1 | 1 | 1 | 1 | 1 | 1 | 0 | 0 | 0 | 0 | 0 | 0 |
| Zinc metallo protease                        | 1 | 1 | 0 | 1 | 1 | 1 | 2 | 2 | 2 | 1 | 1 | 1 |
| Initiation factor 2                          | 0 | 0 | 0 | 0 | 0 | 0 | 0 | 0 | 0 | 0 | 1 | 1 |
| ATP-dependant protease proteolytic subunit   | 1 | 1 | 1 | 1 | 1 | 1 | 0 | 0 | 0 | 0 | 0 | 0 |

### Lipid – Fatty acid metabolism

|                                              |   |   |   |   |   |   |   |   |   |   |   |   |
|----------------------------------------------|---|---|---|---|---|---|---|---|---|---|---|---|
| UDP-N-acetylglucosamine O-acetyltransferase  | 1 | 0 | 0 | 0 | 0 | 0 | 0 | 0 | 0 | 0 | 0 | 0 |
| Lipopolysaccharide biosynthesis protein rf6H | 0 | 0 | 0 | 0 | 0 | 1 | 0 | 0 | 0 | 0 | 0 | 0 |
| Acetyltransferase                            | 0 | 0 | 0 | 0 | 0 | 0 | 1 | 0 | 0 | 0 | 0 | 0 |
| N-acetyltransferase                          | 0 | 0 | 0 | 0 | 0 | 0 | 1 | 1 | 1 | 1 | 1 | 1 |
| Lipoprotein lipase                           | 0 | 0 | 0 | 0 | 0 | 0 | 1 | 1 | 1 | 1 | 1 | 1 |
| Lipase                                       | 0 | 0 | 0 | 1 | 0 | 0 | 0 | 0 | 0 | 0 | 0 | 0 |
| Glycerophosphoryl diesterase                 | 0 | 0 | 0 | 0 | 0 | 0 | 1 | 1 | 1 | 0 | 0 | 1 |
| Lysophospho-lipase                           | 0 | 0 | 0 | 0 | 0 | 0 | 1 | 1 | 1 | 0 | 0 | 1 |
| Patatin-like phospholipase                   | 1 | 1 | 1 | 1 | 1 | 1 | 1 | 1 | 1 | 1 | 1 | 1 |
| <b>Signaling</b>                             |   |   |   |   |   |   |   |   |   |   |   |   |
| Potassium channel protein, PhoH              | 1 | 1 | 1 | 1 | 1 | 1 | 1 | 1 | 1 | 1 | 0 | 1 |
| Phosphate transporter family, Pho4           | 1 | 0 | 0 | 1 | 0 | 0 | 0 | 0 | 0 | 0 | 0 | 0 |
| Ligand-gated channel protein                 | 0 | 0 | 0 | 0 | 0 | 0 | 1 | 0 | 0 | 0 | 1 | 1 |
| Glutamate receptor                           | 0 | 0 | 0 | 0 | 0 | 0 | 1 | 0 | 0 | 0 | 0 | 0 |
| Ca2+ transporting ATPase                     | 0 | 0 | 0 | 0 | 0 | 0 | 0 | 0 | 1 | 1 | 0 | 0 |
| Aquaglyceroporin                             | 0 | 0 | 0 | 0 | 0 | 0 | 0 | 0 | 0 | 1 | 0 | 1 |
| Rhodanese-like domain protein                | 0 | 0 | 1 | 1 | 1 | 1 | 1 | 1 | 1 | 1 | 1 | 1 |
| Serine/Threonine protein kinase              | 1 | 1 | 1 | 1 | 1 | 1 | 8 | 6 | 7 | 6 | 6 | 5 |
| <b>Miscellaneous</b>                         |   |   |   |   |   |   |   |   |   |   |   |   |
| Ornithine:Arginine decarboxylase             | 0 | 0 | 0 | 0 | 0 | 0 | 1 | 1 | 1 | 1 | 1 | 1 |
| Agmatine iminohydrolase                      | 0 | 0 | 0 | 0 | 0 | 0 | 1 | 1 | 1 | 1 | 0 | 1 |
| N-carbamoyl amidohydrolase                   | 0 | 0 | 0 | 0 | 0 | 0 | 1 | 1 | 1 | 1 | 1 | 1 |
| Homospermidine synthase                      | 0 | 0 | 0 | 0 | 0 | 0 | 1 | 1 | 1 | 1 | 1 | 1 |
| Histidine decarboxylase                      | 0 | 0 | 0 | 0 | 0 | 0 | 1 | 1 | 1 | 1 | 1 | 1 |
| Monoamine oxidase                            | 0 | 0 | 0 | 0 | 0 | 0 | 1 | 1 | 1 | 1 | 1 | 1 |
| Amidase                                      | 0 | 0 | 0 | 0 | 0 | 0 | 1 | 1 | 1 | 1 | 1 | 1 |
| mannitol dehydrogenase                       | 0 | 0 | 1 | 0 | 0 | 0 | 0 | 0 | 0 | 0 | 0 | 0 |
| CuZn-superoxyde dismutase                    | 0 | 0 | 1 | 0 | 0 | 0 | 1 | 0 | 0 | 1 | 1 | 1 |
| O-methyl transferase                         | 0 | 0 | 0 | 0 | 0 | 0 | 1 | 0 | 0 | 0 | 0 | 0 |
| ABC transporter protein                      | 0 | 0 | 0 | 0 | 0 | 0 | 1 | 1 | 1 | 1 | 1 | 1 |
| ATPase (AAA+ class)                          | 0 | 0 | 0 | 0 | 0 | 0 | 1 | 1 | 1 | 0 | 0 | 0 |
| Erythrocyte binding protein                  | 0 | 0 | 0 | 0 | 0 | 0 | 0 | 0 | 0 | 0 | 0 | 1 |
| Mucin-desulfating sulfatase                  | 0 | 0 | 0 | 0 | 0 | 0 | 0 | 0 | 0 | 0 | 0 | 1 |
| Hep_Hag family protein                       | 0 | 0 | 0 | 1 | 1 | 1 | 0 | 0 | 0 | 0 | 0 | 0 |
| ABC-1 domain protein                         | 1 | 1 | 1 | 1 | 1 | 1 | 0 | 0 | 0 | 0 | 0 | 0 |
| Fibronectin binding protein                  | 0 | 0 | 0 | 1 | 1 | 0 | 1 | 0 | 0 | 1 | 1 | 1 |
| echinonectin                                 | 0 | 0 | 0 | 0 | 1 | 1 | 0 | 0 | 0 | 0 | 0 | 0 |
| ATP/GTP binding site motif A AGB-1           | 1 | 1 | 1 | 1 | 1 | 1 | 0 | 0 | 0 | 0 | 0 | 0 |
| Viral A-type inclusion protein               | 1 | 1 | 1 | 1 | 1 | 1 | 0 | 0 | 0 | 0 | 0 | 0 |
| Capsid-like protein                          | 7 | 7 | 8 | 8 | 8 | 8 | 5 | 6 | 5 |   |   |   |
| <b>tRNA</b>                                  |   |   |   |   |   |   |   |   |   |   |   |   |
| Lys-tRNA                                     | 0 | 0 | 0 | 0 | 0 | 0 | 3 | 1 | 0 | 1 | 1 | 1 |
| Leu-tRNA                                     | 1 | 1 | 1 | 0 | 0 | 0 | 2 | 2 | 2 | 1 | 1 | 1 |
| Arg-tRNA                                     | 0 | 0 | 0 | 0 | 0 | 0 | 1 | 1 | 1 | 1 | 1 | 1 |
| Val-tRNA                                     | 0 | 0 | 0 | 0 | 0 | 0 | 1 | 1 | 1 | 0 | 0 | 2 |
| Ile-tRNA                                     | 1 | 1 | 1 | 1 | 1 | 1 | 1 | 0 | 1 | 1 | 1 | 0 |
| Gln-tRNA                                     | 0 | 0 | 1 | 1 | 1 | 1 | 0 | 0 | 0 | 1 | 1 | 0 |
| Tyr-tRNA                                     | 0 | 1 | 1 | 1 | 0 | 1 | 1 | 1 | 0 | 1 | 1 | 1 |
| Asn-tRNA                                     | 1 | 1 | 1 | 1 | 1 | 1 | 2 | 1 | 1 | 2 | 2 | 2 |
| Thr-tRNA                                     | 0 | 0 | 1 | 1 | 0 | 1 | 0 | 0 | 0 | 1 | 1 | 0 |
| Gly-tRNA                                     | 0 | 0 | 0 | 0 | 0 | 0 | 0 | 0 | 0 | 1 | 1 | 1 |

|                                      |   |   |   |   |   |   |   |    |    |    |   |    |    |
|--------------------------------------|---|---|---|---|---|---|---|----|----|----|---|----|----|
| Phe-tRNA                             | 0 | 0 | 0 | 0 | 0 | 0 | 0 | 0  | 0  | 0  | 1 | 1  | 0  |
| Ser-tRNA                             | 0 | 0 | 0 | 0 | 0 | 0 | 0 | 0  | 0  | 0  | 0 | 0  | 1  |
| Asp-tRNA                             | 0 | 0 | 0 | 0 | 0 | 0 | 0 | 0  | 0  | 0  | 0 | 0  | 1  |
| <b>Integration and Transposition</b> |   |   |   |   |   |   |   |    |    |    |   |    |    |
| Transposase                          | 0 | 0 | 0 | 0 | 0 | 0 | 1 | 6  | 4  | 0  | 0 | 0  | 0  |
| Resolvase                            | 0 | 0 | 0 | 0 | 0 | 0 | 0 | 2  | 1  | 0  | 0 | 0  | 0  |
| Tlr 6Fp DNA mobile protein           | 0 | 0 | 0 | 0 | 0 | 0 | 1 | 1  | 1  | 1  | 1 | 1  | 1  |
| GIY-YIG endonuclease                 | 0 | 0 | 0 | 0 | 0 | 0 | 7 | 16 | 13 | 10 | 9 | 10 | 10 |
| HNH endonuclease                     | 0 | 0 | 0 | 0 | 0 | 0 | 6 | 18 | 4  | 4  | 6 | 7  | 7  |
